# Supplementary material for: Ni2+-activated MgTi2O5 with broadband emission beyond 1200 nm for NIR-II light source applications
Source: Royal Society of Chemistry journal article supplement (doi:10.1039/d2tc04034d), 2022-01-01
Supplement: d2tc04034d1.pdf [file d2tc04034d1.pdf]

**Supplementary Information for:**

**Ni<sup>2+</sup>-activated MgTi<sub>2</sub>O<sub>5</sub> with broadband emission beyond 1200  
nm for NIR-II light source applications**

Chuan-Jun Tang<sup>a</sup>, Bo-Mei Liu<sup>b,\*</sup>, Lin Huang<sup>b</sup>, Jing Wang<sup>b</sup> and Qiang Tang<sup>a,\*</sup>

<sup>a</sup> *School of Physics, Sun Yat-Sen University, Guangzhou 510275, China. Email:  
ststq@mail.sysu.edu.cn*

<sup>b</sup> *School of Chemistry, Sun Yat-Sen University, Guangzhou 510275, China. Email:  
liubm6@mail.sysu.edu.cn*

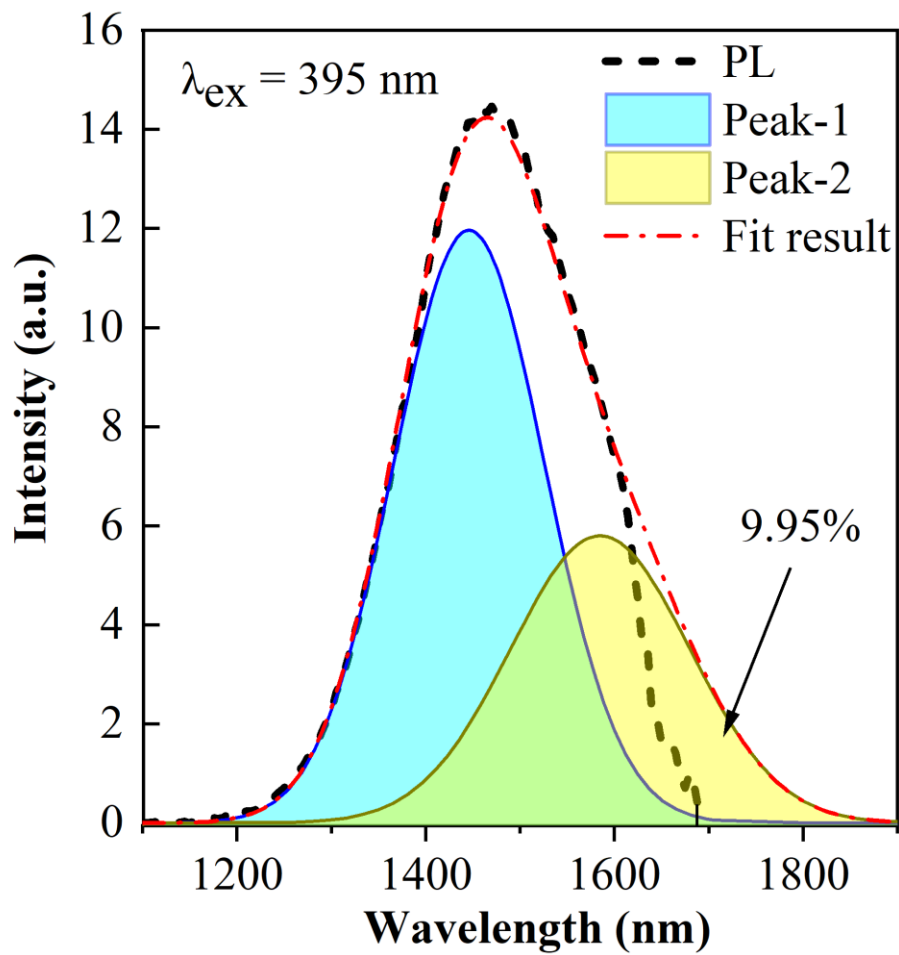

**Figure S1.** PL spectra of MgTi<sub>2</sub>O<sub>5</sub>:0.5%Ni<sup>2+</sup> fitted by Gauss formula.

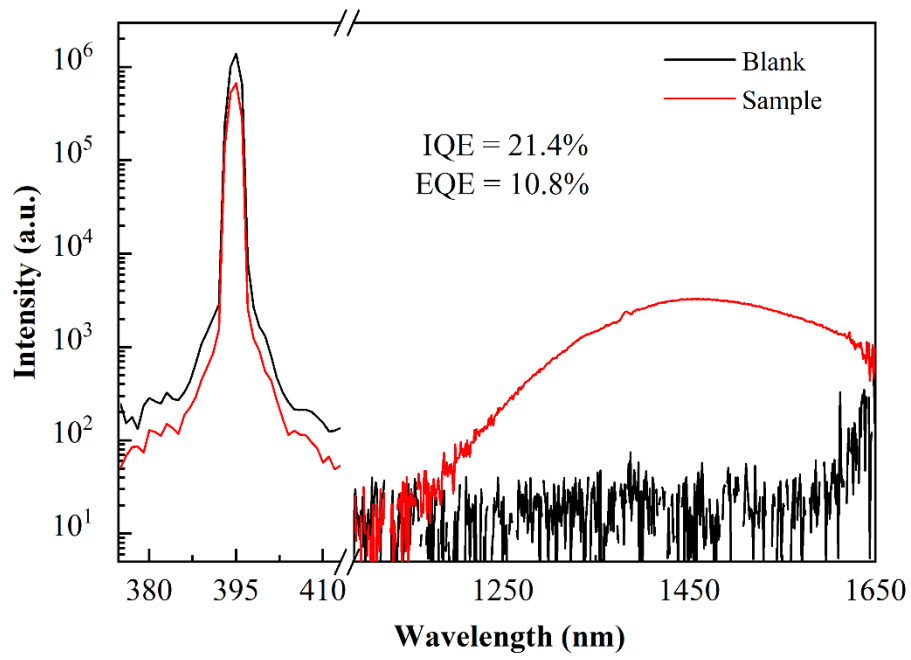

**Figure S2.** IQE and EQE of MgTi<sub>2</sub>O<sub>5</sub>:0.5%Ni<sup>2+</sup> excited by 395 nm.

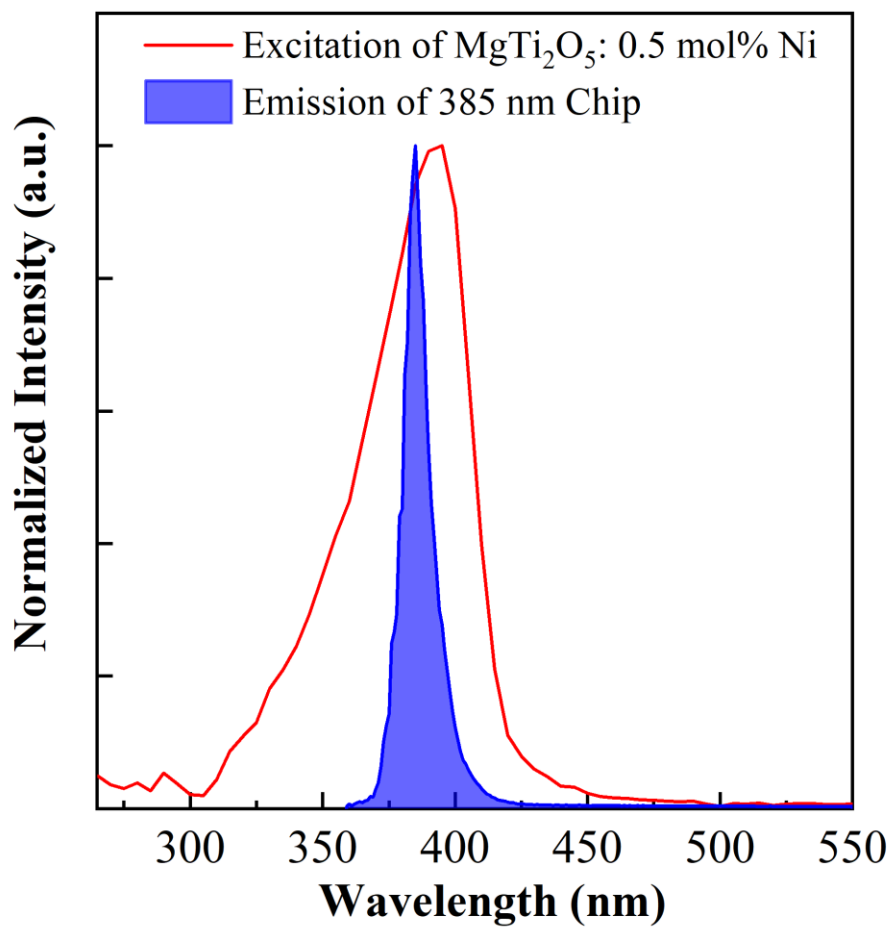

**Figure S3.** Good overlap exists between the excitation of MgTi<sub>2</sub>O<sub>5</sub>:0.5%Ni<sup>2+</sup> and the emission of 385 nm LED chip.

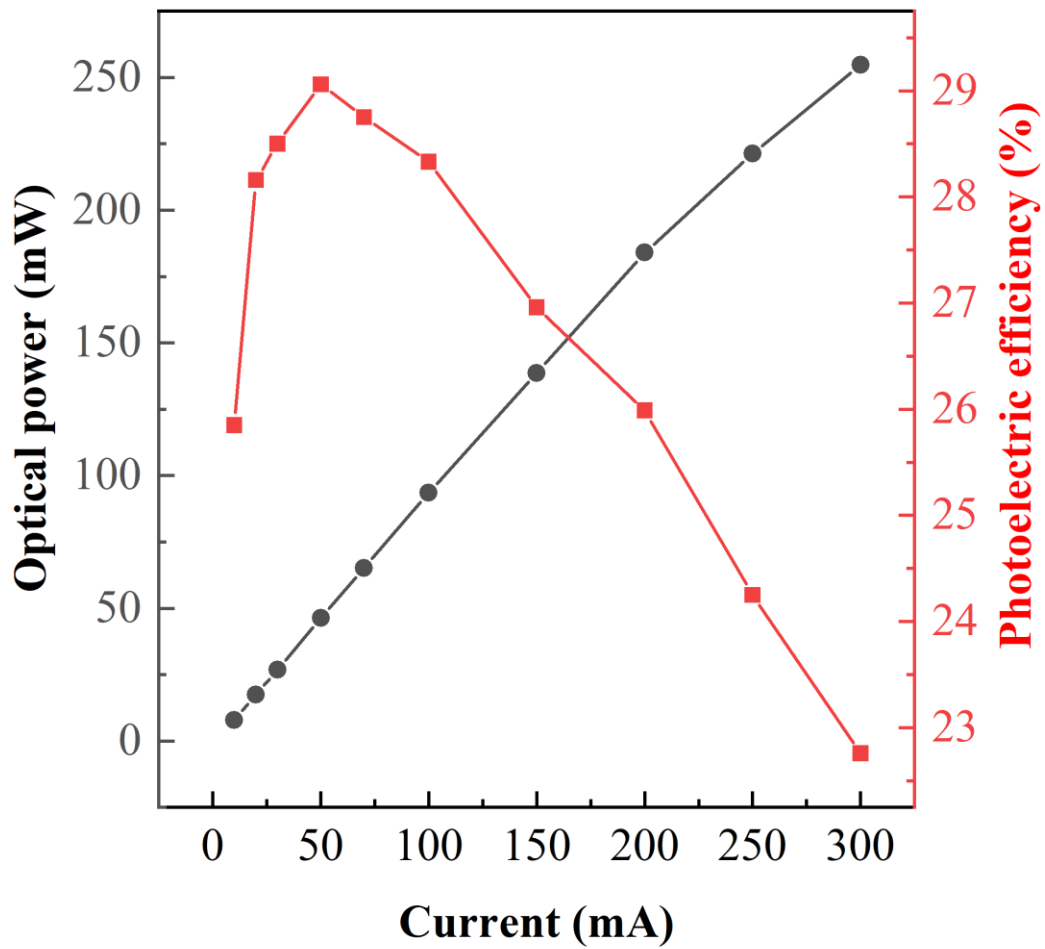

**Figure S4.** Output optical power and photoelectric efficiency of the 385 nm LED chip depending on the driving current.

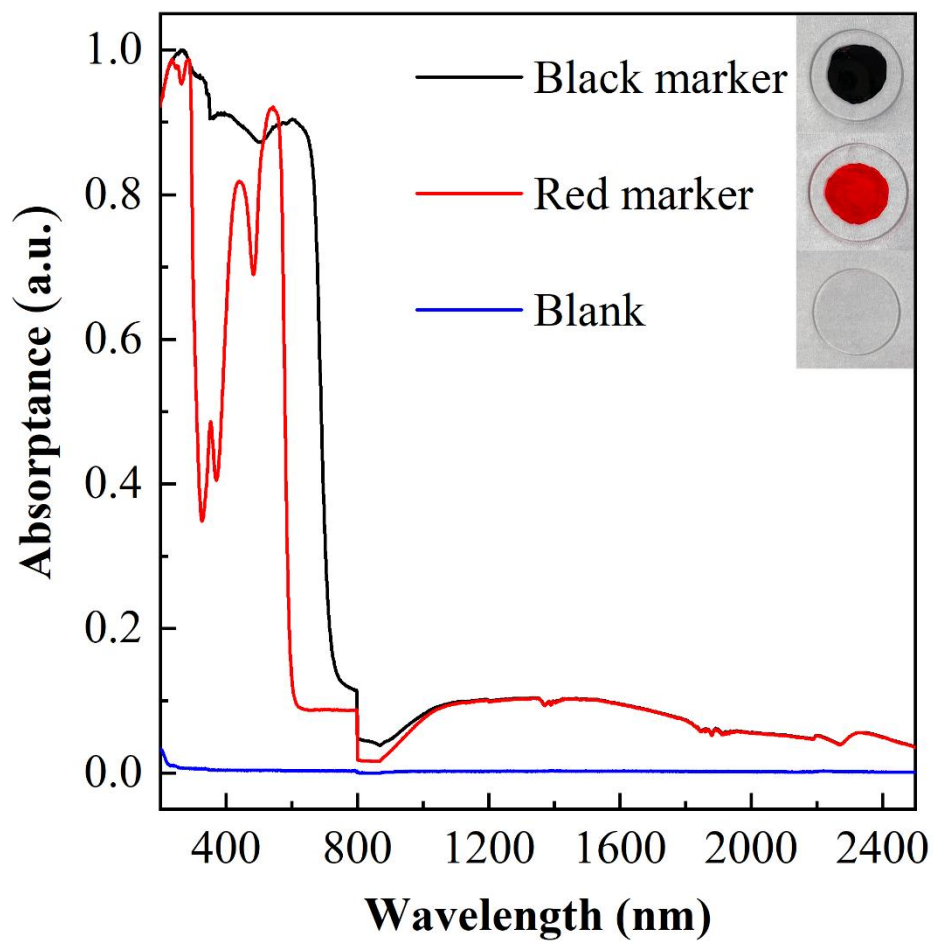

**Figure S5.** Absorption spectra of the black and red marker ink. Note the blank sample is quartz glass .
